# Supplementary material for: An Integrated Safety Analysis of Infants and Children with Symptomatic Spinal Muscular Atrophy (SMA) Treated with Nusinersen in Seven Clinical Trials
Source: Springer Nature journal article supplement (doi:10.1007/s40263-019-00656-w), 2019-08-16

## **Supplementary Material for *CNS Drugs***

### **An Integrated Safety Analysis of Infants and Children with Symptomatic Spinal Muscular Atrophy (SMA) Treated with Nusinersen in Seven Clinical Trials**

Basil T. Darras<sup>1</sup> · Michelle A. Farrar<sup>2</sup> · Eugenio Mercuri<sup>3</sup> · Richard S. Finkel<sup>4</sup> · Richard Foster<sup>5</sup> · Steven G. Hughes<sup>6</sup> · Ishir Bhan<sup>7</sup> · Wildon Farwell<sup>7</sup> · Sarah Gheuens<sup>7</sup>

<sup>1</sup>Department of Neurology, Boston Children's Hospital and Harvard Medical School, Boston, MA, USA

<sup>2</sup>Sydney Children's Hospital Network and UNSW Medicine, UNSW Sydney, Australia

<sup>3</sup>Department of Paediatric Neurology, Catholic University, Rome, Italy

<sup>4</sup>Division of Neurology, Department of Pediatrics, Nemours Children's Hospital, Orlando, FL, USA

<sup>5</sup>Biogen, Maidenhead, Berkshire, UK

<sup>6</sup>Ionis Pharmaceuticals, Inc., Carlsbad, CA, USA

<sup>7</sup>Biogen, Cambridge, MA, USA

**Correspondence to:** Ishir Bhan, Biogen, 225 Binney St, Cambridge, MA, 02142 USA; email:

[Ishir.Bhan@biogen.com](mailto:Ishir.Bhan@biogen.com)

**Table S1** Time on study and exposure to nusinersen

|                                                         | Nusinersen                               |                                      |                                                              | Control                                 |                                     |                                                          |
|---------------------------------------------------------|------------------------------------------|--------------------------------------|--------------------------------------------------------------|-----------------------------------------|-------------------------------------|----------------------------------------------------------|
|                                                         | Infantile-onset<br>SMA<br><i>n</i> = 100 | Later-onset<br>SMA<br><i>n</i> = 140 | All nusinersen-<br>treated<br>participants<br><i>N</i> = 240 | Infantile-onset<br>SMA<br><i>n</i> = 41 | Later-onset<br>SMA<br><i>n</i> = 42 | All control-<br>treated<br>participants<br><i>N</i> = 83 |
| Median (range)<br>number of doses<br>received           | 5.0 (1–12)                               | 4.0 (1–8)                            | 4.0 (1–12)                                                   | 4.0 (1–6)                               | 4.0 (4–4)                           | 4.0 (1–6)                                                |
| Mean (SD) total<br>amount of nusinersen<br>received, mg | 60.6 (26.5)                              | 51.4 (14.9)                          | 55.2 (21.0)                                                  | 0                                       | 0                                   | 0                                                        |
| Median (range) time<br>on study, days                   | 308.0<br>(6–1429)                        | 456.0<br>(31–1538)                   | 449.0<br>(6–1538)                                            | 187.0<br>(20–423)                       | 450.0<br>(364–482)                  | 400.0<br>(20–482)                                        |
| Total number of<br>patient-years                        | 108.65                                   | 267.20                               | 375.85                                                       | 25.39                                   | 50.99                               | 76.38                                                    |

**Table S2** Respiratory, renal, and hepatic AEs<sup>a</sup>

|                                                                             | Nusinersen                               |                                      |                                                              | Control                                 |                                     |                                                          |
|-----------------------------------------------------------------------------|------------------------------------------|--------------------------------------|--------------------------------------------------------------|-----------------------------------------|-------------------------------------|----------------------------------------------------------|
|                                                                             | Infantile-onset<br>SMA<br><i>n</i> = 100 | Later-onset<br>SMA<br><i>n</i> = 140 | All nusinersen-<br>treated<br>participants<br><i>N</i> = 240 | Infantile-onset<br>SMA<br><i>n</i> = 41 | Later-onset<br>SMA<br><i>n</i> = 42 | All control-<br>treated<br>participants<br><i>N</i> = 83 |
| Respiratory, thoracic, and mediastinal disorders, <i>n</i> (%) <sup>b</sup> | 79 (79)                                  | 62 (44)                              | 141 (59)                                                     | 36 (88)                                 | 17 (40)                             | 53 (64)                                                  |
| Respiratory distress                                                        | 30 (30)                                  | 4 (3)                                | 34 (14)                                                      | 12 (29)                                 | 2 (5)                               | 14 (17)                                                  |
| Respiratory failure                                                         | 27 (27)                                  | 1 (<1)                               | 28 (12)                                                      | 16 (39)                                 | 1 (2)                               | 17 (20)                                                  |
| Atelectasis                                                                 | 24 (24)                                  | 1 (<1)                               | 25 (10)                                                      | 12 (29)                                 | 0                                   | 12 (14)                                                  |
| Acute respiratory failure                                                   | 17 (17)                                  | 1 (<1)                               | 18 (8)                                                       | 10 (24)                                 | 0                                   | 10 (12)                                                  |
| Cough                                                                       | 16 (16)                                  | 27 (19)                              | 43 (18)                                                      | 8 (20)                                  | 9 (21)                              | 17 (20)                                                  |
| Nasal congestion                                                            | 15 (15)                                  | 6 (4)                                | 21 (9)                                                       | 5 (12)                                  | 2 (5)                               | 7 (8)                                                    |
| Pneumonia aspiration                                                        | 12 (12)                                  | 1 (<1)                               | 13 (5)                                                       | 7 (17)                                  | 0                                   | 7 (8)                                                    |
| Hypoxia                                                                     | 11 (11)                                  | 2 (1)                                | 13 (5)                                                       | 2 (5)                                   | 0                                   | 2 (2)                                                    |
| Dyspnea                                                                     | 9 (9)                                    | 0                                    | 9 (4)                                                        | 6 (15)                                  | 0                                   | 6 (7)                                                    |
| Bronchial secretion retention                                               | 8 (8)                                    | 0                                    | 8 (3)                                                        | 7 (17)                                  | 0                                   | 7 (8)                                                    |
| Respiratory arrest                                                          | 6 (6)                                    | 0                                    | 6 (3)                                                        | 4 (10)                                  | 0                                   | 4 (5)                                                    |

|                                    |       |        |        |        |        |         |
|------------------------------------|-------|--------|--------|--------|--------|---------|
| Rhinorrhea                         | 8 (8) | 12 (9) | 20 (8) | 3 (7)  | 7 (17) | 10 (12) |
| Sleep apnea syndrome               | 1 (1) | 1 (<1) | 2 (<1) | 4 (10) | 0      | 4 (5)   |
| Renal and urinary disorders, n (%) | 2 (2) | 6 (4)  | 8 (3)  | 1 (2)  | 1 (2)  | 2 (2)   |
| Urinary incontinence               | 0     | 2 (1)  | 2 (<1) | 0      | 0      | 0       |
| Urinary retention                  | 1 (1) | 1 (<1) | 2 (<1) | 0      | 1 (2)  | 1 (1)   |
| Vesicoureteric reflux              | 0     | 2 (1)  | 2 (<1) | 0      | 0      | 0       |
| Dysuria                            | 0     | 1 (<1) | 1 (<1) | 0      | 0      | 0       |
| Hydronephrosis                     | 1 (1) | 0      | 1 (<1) | 0      | 0      | 0       |
| Glycosuria                         | 0     | 0      | 0      | 1 (2)  | 0      | 1 (1)   |
| Hepatobiliary disorders, n (%)     | 1 (1) | 0      | 1 (<1) | 0      | 0      | 0       |
| Hepatomegaly                       | 1 (1) | 0      | 1 (<1) | 0      | 0      | 0       |

---

*AE* adverse event, *SMA* spinal muscular atrophy

<sup>a</sup>Incidence of all AEs occurring under the respiratory, thoracic and mediastinal disorders; renal and urinary disorders; and hepatobiliary disorders System Organ Classes

<sup>b</sup>AEs shown occurred with ≥10% incidence in one group

**Table S3** Shifts to abnormal in ECG results

|                                         | Nusinersen                            |                                   |                                                       | Control                              |                                  |                                                   |
|-----------------------------------------|---------------------------------------|-----------------------------------|-------------------------------------------------------|--------------------------------------|----------------------------------|---------------------------------------------------|
|                                         | Infantile-onset SMA<br><i>n</i> = 100 | Later-onset SMA<br><i>n</i> = 140 | All nusinersen-treated participants<br><i>N</i> = 240 | Infantile-onset SMA<br><i>n</i> = 41 | Later-onset SMA<br><i>n</i> = 42 | All control-treated participants<br><i>N</i> = 83 |
| ECG shifts to abnormal <sup>a</sup>     |                                       |                                   |                                                       |                                      |                                  |                                                   |
| Clinically significant <sup>b</sup>     | 10/81 (12)                            | 0/109                             | 10/190 (5) <sup>c</sup>                               | 0/34                                 | 2/33 (6)                         | 2/67 (3)                                          |
| Not clinically significant <sup>d</sup> | 22/81 (27)                            | 54/109 (50)                       | 76/190 (40)                                           | 5/34 (15)                            | 13/33 (39)                       | 18/67 (27)                                        |

ECG electrocardiogram; SMA spinal muscular atrophy

<sup>a</sup>Number with a shift/number at risk (percentage); number at risk is the number of participants whose baseline value was not abnormal and who had at least one post-baseline value

<sup>b</sup>Shift to “abnormal, clinically significant” includes “unknown” or “normal” to “abnormal, clinically significant”

<sup>c</sup>Clinically significant abnormal findings in nusinersen-treated participants included: marked change in frontal plane axis almost certainly due to limb lead error at day 92 visit, next ECG result was normal; prominent right atrial and right ventricular forces at day 568 visit, next ECG result was normal (*n* = 1); right axis deviation and upright T wave in V1 abnormality at day 337 visit, echocardiogram results normal; right axis deviation with positive T wave in V1 and very small LV forces at day 568 visit (*n* = 1); right atrial enlargement likely biventricular hypertrophy at visit day 29, repeat testing showed biventricular hypertrophy mid precordial voltage and probably right atrial enlargement (*n* = 1); large increase in right ventricular forces in V6 at day 29 visit, next ECG result was normal (*n* = 1); left ventricular hypertrophy by voltage criteria on day 330 (*n* = 1); ventricular forces significantly increased, left ventricular hypertrophy and right ventricular forces close to right ventricular hypertrophy at day 148 (*n* = 1); right atrial enlargement, possible right ventricular hypertrophy linked to AE of right-sided cardiac strain on day 218 (*n* = 1); clear axis deviation and prominent right ventricular forces consistent with probable right ventricular hypertrophy at day 29 (*n* = 1); marked sinus tachycardia at day 29, next ECG result was normal (*n* = 1); marked and unusual ST elevations in almost every lead consistent with pericarditis if not an artifact on day 14, next ECG result was normal (*n* = 1)

<sup>d</sup>Shift to “abnormal, not clinically significant” includes “unknown” or “normal” to “abnormal, not clinically significant”

**Fig. S1** Median, minimum, and maximum ALT and AST levels in nusinersen-treated and control participants from (a, c) ENDEAR and (b, d) CHERISH. Graph b study visit Day 2: nusinersen,  $n = 78$ ; control,  $n = 40$ ; graph c study visit Day 2: nusinersen,  $n = 69$ ; control,  $n = 31$ . ALT alanine aminotransferase, AST aspartate aminotransferase

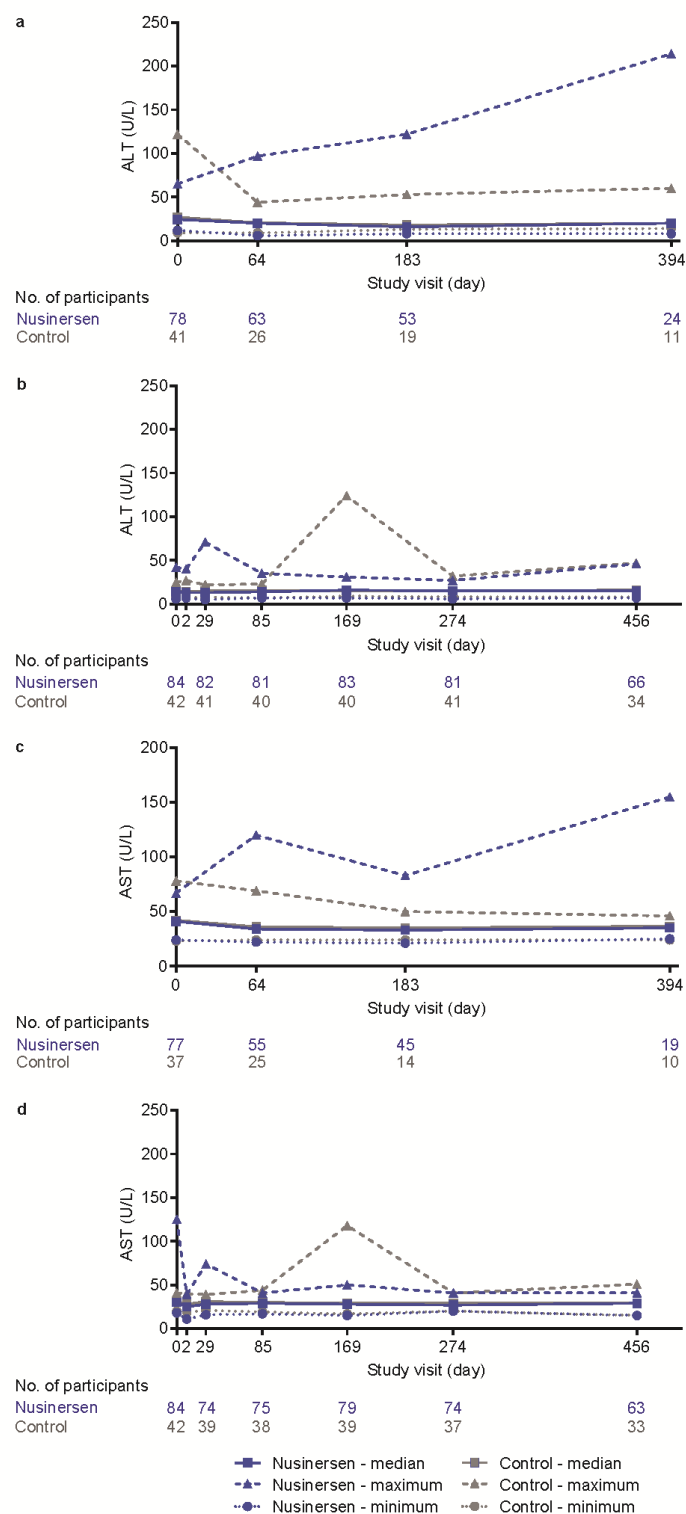

Supplement: MOESM1 [file 24115938]
